# Supplementary material for: Knowledge and Attitudes Toward Anaphylaxis to Local Anesthetics in Dental Practice: A Latin American Cross-Sectional Study
Source: Research Square preprint supplement (doi:10.21203/rs.3.rs-3349968/v1), 2023-09-15
Supplement: Supplementary file 1 [file a8bb56cb39c46c7641263521.docx]

**Supplementary Materials**

**Questionnaire**

1. Age of the dentist (years):
   1. 25–30
   2. 31–45
   3. >46
2. Duration of dental practice (years):
   1. Less than 5
   2. 6–15
   3. >16
3. You are qualified as a:
   1. General dentist
   2. Specialist dentist
4. Please write down the names of the local anesthetics that you use in your daily practice:
   1. Lidocaine
   2. Articaine
   3. Prilocaine
   4. Others
5. Do you prefer local anesthesia with adrenaline or without adrenaline?
   1. With adrenaline
   2. Without adrenaline
6. Do you ask your patients if they have any drug allergies before the treatment?
   1. Yes
   2. No
7. Do you ask your patients whether they got local anesthetic administration done prior for any dental procedures?
   1. Yes
   2. No
8. Do you give a test dose on a routine basis?
   1. Yes
   2. No
9. How do you behave when you see a patient with a suspected local anesthesia allergy? a) I do not begin the treatment
   1. I make a skin prick test with the suspected drug by myself
   2. I refer the patient to an allergy specialist with the suspected drug for testing
   3. I treat the patient without local anesthesia
   4. Others
10. How do you behave when you see a patient without any drug allergy, but with any other allergic diseases, such as asthma or hay fever?
    1. I make the treatment without considering the other allergic problems
    2. I accept these problems as a risk factor and refer the patient to the specialist
11. Have you ever seen a patient with systemic adverse reaction due to local anesthesia?
    1. Yes
    2. No
12. If you have seen a case with systemic adverse reaction due to local anesthesia, has this occurred during your treatment?
    1. Yes
    2. No
13. Which symptoms below remind you of anaphylaxis during your treatment?
    1. Nausea and vomiting
    2. Shortness of breath
    3. Skin rash
    4. Skin swelling
    5. Hypotension
14. What reaction do you suspect suggestive of anaphylaxis after test dose?
    1. Skin rashes
    2. Itching
    3. Dyspnea
    4. Sudden fainting
15. Which one of the drugs below do you keep in your office?
    1. Epinephrine
    2. Antihistamine
    3. Corticosteroids
    4. Glucagon
    5. Salbutamol
    6. None of the above
16. Which drug should be used as the first choice in management of anaphylaxis?
    1. Epinephrine
    2. Antihistamine
    3. Corticosteroids
    4. Glucagon
    5. Salbutamol
17. Which route do you prefer as initial route for epinephrine injection?
    1. Intramuscular
    2. Subcutaneous
    3. Intravenous
    4. I do not know

These are not "correct or incorrect" answers; they reflect the respondents' views or practices. However, there are some answers that align more closely with current medical guidelines. Below are those that generally align with these guidelines for the knowledge and attitude component of our survey:

1. **What local anesthetic do you use?**
   - Lidocaine is commonly used, but all listed options are legitimate depending on the situation.
2. **Do you prefer local anesthetics with epinephrine or without epinephrine?**
   - "With Epinephrine" is commonly used to prolong the duration of anesthesia and reduce bleeding, but both have their places.
3. **Do you complete a clinical history of your patients before a procedure or treatment?**
   - "Yes" aligns with best practices for patient safety.
4. **Do you routinely administer a test dose of local anesthetic?**
   - Practices may vary, but administering a test dose is generally not a standard practice for local anesthetics.
5. **How do you behave when you care for a patient with a suspected allergy to local anesthesia?**
   - Referring the patient to an allergist is often considered the best practice.
6. **How do you behave when caring for a patient who does not have drug allergies, but has other allergic conditions, such as asthma or allergic rhinitis?**
   - Considering these problems as a risk factor and possibly referring the patient to a specialist aligns with a cautious approach.
7. **Have you ever seen a patient with a systemic adverse reaction caused by local anesthesia?**
   - This is a yes/no question, so there is no "correct" answer.
8. **If you have seen a case of systemic adverse reaction caused by local anesthesia, did this occur during your treatment?**
   - This is also a yes/no question, so there is no "correct" answer.
9. **What are the symptoms of an anaphylactic reaction during the application of local anesthetics?**
   - Dyspnea, Cutaneous Eruption, Edema, and Hypotension are generally associated with anaphylaxis.
10. **After administering the test dose, what reaction is suspected of anaphylaxis?**
    - Dyspnea, Cutaneous reaction, and Hypotension are generally more associated with anaphylaxis than Syncope or Pruritus.
11. **Which of the following medications do you have in your office?**
    - Epinephrine, Antihistamines, and Corticosteroids are often recommended for emergency situations.
12. **What drug should be used as the first option to treat anaphylaxis?**
    - Epinephrine is the first-line treatment for anaphylaxis.
13. **Which route do you prefer for the initial administration of epinephrine injection?**
    - Intramuscular is the recommended route for the initial administration of epinephrine for anaphylaxis.

Note that medical guidelines can change over time and may vary by jurisdiction. Always refer to the most current guidelines and consult medical professionals for the most accurate and personalized advice.
